# Supplementary material
Source: publisher figshare collection journal article supplement (https://tandf.figshare.com/ndownloader/files/13902869)
Supplement: Supplementary file 1 [file 13902869]

| Supplemental Table 1. Search terms | | |
| --- | --- | --- |
| Broad Category | Chemical | Search Terms |
| Persistent organic pollutants (POPs) | Dichlorodiphenyltrichloroethane (DDT) | “Dichlorodiphenyltrichloroethane and preeclampsia”, “DDT and preeclampsia” |
| Hexachlorobenzene (HCB) | “Hexachlorobenzene and preeclampsia”, “HCB and preeclampsia” |
| Polychlorinated biphenyls (PCB) | “Polychlorinated biphenyls and preeclampsia”, “PCBs and preeclampsia” |
| Polybrominated diphenyl ethers (PBDE) | “Polybrominated diphenyl ethers and preeclampsia”, “PBDEs and preeclampsia” |
| Organochlorine pesticides | “Organochlorines and preeclampsia” |
| Dioxins/furans | “Dioxin and preeclampsia”, “Furans and preeclampsia” |
| Perfluorooctanoic acid (PFOA) & perfluorooctane sulfonic acid (PFOS) | “Perfluorooctanoic acid & perfluorooctane sulfonic acid and preeclampsia”, “PFOA and preeclampsia”, “PFOS and preeclampsia”, “Perfluorooctanoic acid and preeclampsia”, “Perfluorooctane sulfonic acid and preeclampsia” |
| Aldrin/dieldrin | “Aldrin and preeclampsia”, “Dieldrin and preeclampsia” |
| Chlordane | “Chlordane and preeclampsia” |
| Endrin | “Endrin and preeclampsia” |
| Mirex | “Mirex and preeclampsia” |
| Heptachlor | “Heptachlor and preeclampsia” |
| Toxaphene | “Toxaphene and preeclampsia” |
| Persistent organic pollutants (POP) | “Persistent organic pollutants and preeclampsia”, “POPs and preeclampsia” |
| Drinking water contaminants | Chlorination disinfection byproducts | “Chlorine solvents and preeclampsia”, “chlorine and preeclampsia”, “DBP and preeclampsia”, “trihalomethanes and preeclampsia”, “THM and preeclampsia”, “haloacetic acids and preeclampsia”, “HAA and preeclampsia” |
| Chlorinated solvents | “Trichloroethylene and preeclampsia,” “TCE and preeclampsia”, “Tetrachloroethylene and preeclampsia”, “PCE and preeclampsia” |
| Contaminants | “Drinking water and preeclampsia” |
| Atmospheric pollutants | Ozone | “Ozone and preeclampsia”, “O3 and preeclampsia” |
| Carbon monoxide | “Carbon monoxide and preeclampsia” |
| Sulfur dioxide | “Sulfur dioxide and preeclampsia”, “SO2 and preeclampsia” |
| Nitrogen dioxide | “Nitrogen dioxide and preeclampsia”, “NO2 and preeclampsia” |
| Particulates | “Particulate matter and preeclampsia”, “Particulates and preeclampsia” |
| Environmental tobacco smoke | “Environmental tobacco smoke and preeclampsia”, “ETS and preeclampsia” |
| Polycyclic aromatic hydrocarbons (PAHs) | “Polycyclic aromatic hydrocarbons and preeclampsia”, “PAHs and preeclampsia” |
| Volatile organic compounds (VOCs) | “Volatile organic compounds and preeclampsia”, “VOCs and preeclampsia” |
| Air pollutants | “Air pollution and preeclampsia”, “Hazardous air pollutants and preeclampsia” |
| Metals and metalloids | Arsenic | “Arsenic and preeclampsia” |
| Cadmium | “Cadmium and preeclampsia” |
| Chromium | “Chromium and preeclampsia” |
| Mercury | “Mercury and preeclampsia” |
| Metalloids | “Metalloids and preeclampsia” |
| Other environmental contaminants | Phthalates | “Phthalates and preeclampsia”, “PAE and preeclampsia” |
| Bisphenol A (BPA) | “Bisphenol A and preeclampsia”, “BPA and preeclampsia” |
| Non-persistent pesticides | “Non-persistent pesticides and preeclampsia”, “Organophosphates and preeclampsia”, “Atrazine and preeclampsia” |
